# Supplementary material for: Characterization of osimertinib (AZD9291)-resistant non-small cell lung cancer NCI-H1975/OSIR cell line
Source: PubMed Central journal article supplement (PMC5348415; doi:10.18632/oncotarget.13150), 2016-11-07
Supplement: oncotarget-07-81598-s001.pdf [file oncotarget-07-81598-s001.pdf]

## Characterization of osimertinib (AZD9291)-resistant non-small cell lung cancer NCI-H1975/OSIR cell line

### SUPPLEMENTARY FIGURE

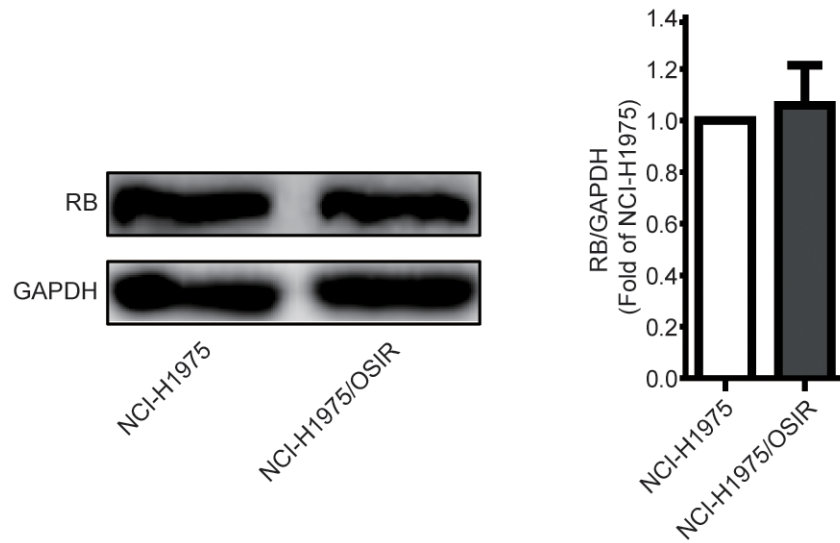

Supplementary Figure S1: The protein expression of RB in NCI-H1975 and NCI-H1975/OSIR cells was determined by western blot assay.
